# Supplementary material for: Combining PET/CT with serum tumor markers to improve the evaluation of histological type of suspicious lung cancers
Source: PubMed Central journal article supplement (PMC5587306; doi:10.1371/journal.pone.0184338), 2017-09-06
Supplement: pone.0184338.s001.pdf [file pone.0184338.s001.pdf]

**S1 Table. Clinical and pathology information of 201 patients with suspicious lung cancers**

| Patient | Gender | Age | CEA    | CYFRA21-1 | NSE   | SCC-Ag | Smokers | Surgery | Biopsy | Pathology      | Differentiation  | EGFR mutation | Stage           |
|---------|--------|-----|--------|-----------|-------|--------|---------|---------|--------|----------------|------------------|---------------|-----------------|
| 1       | Male   | 72  | 15.47  | 218.40    | 37.73 | 68.80  | Yes     | No      | Yes    | SCC            | Indeterminate    |               | AJCC stage IV   |
| 2       | Female | 66  | 7.92   | 2.60      | 13.27 | 1.00   | No      | Yes     | No     | SCLC           | Undifferentiated |               | Limited stage   |
| 3       | Male   | 80  | 4.07   | 2.35      | 11.29 | 1.90   | Yes     | No      | Yes    | SCC            | Poor             |               | AJCC stage I    |
| 4       | Male   | 55  | 49.79  | 6.85      | 14.51 | 2.50   | Yes     | No      | Yes    | SCC            | Indeterminate    |               | AJCC stage IV   |
| 5       | Male   | 49  | 4.02   | 4.33      | 13.46 | 0.40   | Yes     | Yes     | No     | Adenocarcinoma | Poor             |               | AJCC stage I    |
| 6       | Male   | 65  | 7.81   | 1.96      | 10.93 | 0.70   | Yes     | Yes     | No     | Benign lesion  |                  |               |                 |
| 7       | Male   | 32  | 0.89   | 1.82      | 11.37 | 11.80  | Yes     | Yes     | No     | Adenocarcinoma | Moderate         |               | AJCC stage I    |
| 8       | Male   | 56  | 3.54   | 10.95     | 11.37 | 1.10   | Yes     | Yes     | No     | SCC            | Moderate         |               | AJCC stage I    |
| 9       | Male   | 68  | 2.06   | 81.74     | 27.44 | 1.90   | Yes     | Yes     | No     | SCC            | Moderate         |               | AJCC stage II   |
| 10      | Male   | 65  | 6.23   | 4.28      | 12.95 | 0.90   | Yes     | No      | Yes    | SCC            | Indeterminate    |               | AJCC stage III  |
| 11      | Male   | 65  | 15.18  | 4.23      | 13.73 | 2.90   | Yes     | No      | Yes    | SCC            | Indeterminate    |               | AJCC stage IV   |
| 12      | Female | 70  | 1.43   | 3.58      | 10.41 | 0.40   | No      | Yes     | No     | Benign lesion  |                  |               |                 |
| 13      | Male   | 63  | 9.66   | 7.11      | 18.89 | 2.10   | Yes     | No      | Yes    | SCC            | Indeterminate    |               | AJCC stage III  |
| 14      | Female | 62  | 215.84 | 3.86      | 22.81 | 0.50   | No      | No      | Yes    | Adenocarcinoma | Indeterminate    |               | AJCC stage IV   |
| 15      | Male   | 81  | 5.39   | 5.43      | 7.57  | 0.70   | Yes     | No      | Yes    | SCC            | Indeterminate    |               | AJCC stage II   |
| 16      | Male   | 65  | 22.86  | 3.59      | 7.83  | 0.90   | Yes     | No      | Yes    | Adenocarcinoma | Indeterminate    |               | AJCC stage IV   |
| 17      | Male   | 73  | 1.73   | 3.67      | 8.45  | 1.50   | Yes     | Yes     | No     | Adenocarcinoma | Moderate         |               | AJCC stage III  |
| 18      | Female | 45  | 26.85  | 2.18      | 26.65 | 0.50   | No      | No      | Yes    | Adenocarcinoma | Poor             |               | AJCC stage IV   |
| 19      | Male   | 45  | 5.45   | 6.46      | 14.32 | 0.80   | No      | Yes     | No     | Adenocarcinoma | Indeterminate    |               | AJCC stage IV   |
| 20      | Male   | 50  | 761.93 | 5.56      | 19.65 | 0.60   | No      | No      | Yes    | Adenocarcinoma | Indeterminate    |               | AJCC stage IV   |
| 21      | Male   | 56  | 4.54   | 2.86      | 65.14 | 1.00   | Yes     | No      | Yes    | SCLC           | Undifferentiated |               | Extensive stage |
| 22      | Male   | 57  | 115.67 | 59.80     | 46.98 | 0.60   | No      | No      | Yes    | Adenocarcinoma | Indeterminate    |               | AJCC stage IV   |
| 23      | Male   | 58  | 3.45   | 2.29      | 9.93  | 0.50   | No      | No      | Yes    | Adenocarcinoma | Indeterminate    |               | AJCC stage III  |

|    |        |    |        |      |       |      |     |     |     |                |                  |          |                 |
|----|--------|----|--------|------|-------|------|-----|-----|-----|----------------|------------------|----------|-----------------|
| 24 | Female | 61 | 4.46   | 1.77 | 10.83 | 0.40 | No  | No  | No  | Adenocarcinoma | Indeterminate    |          | AJCC stage IV   |
| 25 | Male   | 49 | 1.88   | 1.70 | 12.33 | 0.40 | Yes | Yes | No  | Benign lesion  |                  |          |                 |
| 26 | Female | 51 | 3.23   | 1.60 | 19.23 | 0.30 | No  | Yes | No  | Adenocarcinoma | Well             |          | AJCC stage I    |
| 27 | Female | 55 | 3.31   | 2.48 | 8.98  | 0.60 | No  | No  | Yes | Benign lesion  |                  |          |                 |
| 28 | Female | 57 | 23.13  | 6.78 | 11.07 | 1.20 | No  | Yes | No  | Adenocarcinoma | Indeterminate    |          | AJCC stage I    |
| 29 | Male   | 49 | 4.21   | 3.22 | 58.31 | 0.60 | No  | No  | No  | SCLC           | Undifferentiated |          | Extensive stage |
| 30 | Male   | 72 | 1.45   | 1.97 | 8.84  | 0.80 | No  | Yes | No  | Adenocarcinoma | Well             |          | AJCC stage I    |
| 31 | Male   | 69 | 0.98   | 3.39 | 10.03 | 0.60 | No  | Yes | No  | Benign lesion  |                  |          |                 |
| 32 | Female | 53 | 13.23  | 2.54 | 11.49 | 1.30 | No  | No  | Yes | Adenocarcinoma | Indeterminate    | Negative | AJCC stage IV   |
| 33 | Male   | 58 | 2.76   | 0.94 | 16.59 | 1.10 | No  | Yes | No  | Benign lesion  |                  |          |                 |
| 34 | Female | 41 | 1.92   | 3.03 | 12.14 | 0.70 | No  | No  | No  | Adenocarcinoma | Indeterminate    |          | AJCC stage I    |
| 35 | Male   | 72 | 3.82   | 3.56 | 14.17 | 0.80 | Yes | Yes | No  | Benign lesion  |                  |          |                 |
| 36 | Male   | 56 | 4.68   | 1.69 | 9.10  | 1.90 | Yes | Yes | No  | Benign lesion  |                  |          |                 |
| 37 | Male   | 36 | 1.26   | 1.15 | 9.27  | 0.60 | No  | Yes | No  | Benign lesion  |                  |          |                 |
| 38 | Female | 70 | 2.72   | 2.98 | 11.24 | 0.80 | No  | No  | No  | Adenocarcinoma | Moderate         | Positive | AJCC stage II   |
| 39 | Male   | 36 | 0.70   | 0.74 | 8.34  | 0.50 | No  | No  | Yes | Benign lesion  |                  |          |                 |
| 40 | Male   | 65 | 364.69 | 7.61 | 27.27 | 0.60 | Yes | No  | Yes | Adenocarcinoma | Poor             |          | AJCC stage IV   |
| 41 | Female | 76 | 269.43 | 5.27 | 17.56 | 0.90 | No  | No  | Yes | Adenocarcinoma | Indeterminate    |          | AJCC stage III  |
| 42 | Male   | 63 | 3.01   | 2.82 | 18.09 | 3.00 | No  | No  | Yes | SCC            | Indeterminate    |          | AJCC stage IV   |
| 43 | Male   | 51 | 1.67   | 2.51 | 11.24 | 0.90 | Yes | Yes | No  | Benign lesion  |                  |          |                 |
| 44 | Male   | 51 | 3.39   | 2.23 | 12.06 | 0.80 | Yes | Yes | No  | Adenocarcinoma | Indeterminate    | Negative | AJCC stage I    |
| 45 | Female | 60 | 1.88   | 2.91 | 12.92 | 0.60 | No  | Yes | No  | Adenocarcinoma | Poor             |          | AJCC stage III  |
| 46 | Female | 54 | 2.64   | 1.21 | 12.91 | 0.50 | No  | Yes | No  | Adenocarcinoma | Moderate         |          | AJCC stage I    |
| 47 | Female | 60 | 1.54   | 2.32 | 22.89 | 0.90 | No  | No  | No  | SCLC           | Undifferentiated |          | Extensive stage |
| 48 | Male   | 66 | 82.74  | 4.14 | 9.43  | 1.20 | Yes | Yes | No  | Adenocarcinoma | Indeterminate    |          | AJCC stage III  |

|    |        |    |        |       |       |       |     |     |     |                      |                  |          |                 |
|----|--------|----|--------|-------|-------|-------|-----|-----|-----|----------------------|------------------|----------|-----------------|
| 49 | Male   | 52 | 2.44   | 1.16  | 21.46 | 0.60  | Yes | No  | Yes | Adenocarcinoma       | Indeterminate    |          | AJCC stage IV   |
| 50 | Female | 47 | 0.90   | 3.24  | 10.55 | 0.70  | No  | Yes | No  | Adenocarcinoma       | Moderate         |          | AJCC stage I    |
| 51 | Male   | 62 | 5.66   | 47.60 | 22.53 | 14.70 | No  | No  | Yes | SCC                  | Indeterminate    |          | AJCC stage III  |
| 52 | Female | 70 | 4.27   | 1.86  | 12.63 | 0.50  | No  | No  | Yes | Adenocarcinoma       | Indeterminate    |          | AJCC stage IV   |
| 53 | Female | 66 | 1.48   | 2.90  | 18.80 | 1.00  | No  | Yes | No  | Benign lesion        |                  |          |                 |
| 54 | Male   | 76 | 1.11   | 3.76  | 48.39 | 0.60  | Yes | No  | Yes | Large-cell carcinoma | Indeterminate    |          | AJCC stage II   |
| 55 | Male   | 48 | 1.51   | 2.40  | 21.39 | 0.30  | Yes | Yes | No  | Benign lesion        |                  |          |                 |
| 56 | Male   | 43 | 16.83  | 10.64 | 11.63 | 0.90  | No  | No  | Yes | Adenocarcinoma       | Indeterminate    |          | AJCC stage IV   |
| 57 | Female | 47 | 228.48 | 12.11 | 16.21 | 0.20  | No  | No  | Yes | Adenocarcinoma       | Indeterminate    | Positive | AJCC stage IV   |
| 58 | Male   | 69 | 47.23  | 5.75  | 13.88 | 1.50  | Yes | No  | Yes | Adenocarcinoma       | Indeterminate    |          | AJCC stage III  |
| 59 | Male   | 72 | 26.78  | 3.44  | 15.15 | 0.90  | Yes | No  | Yes | Adenocarcinoma       | Indeterminate    |          | AJCC stage IV   |
| 60 | Male   | 63 | 2.88   | 1.80  | 10.09 | 1.50  | Yes | Yes | No  | Large-cell carcinoma | Indeterminate    |          | AJCC stage II   |
| 61 | Male   | 61 | 57.62  | 12.47 | 16.79 | 3.70  | Yes | No  | Yes | SCC                  | Indeterminate    |          | AJCC stage II   |
| 62 | Male   | 77 | 34.10  | 11.98 | 53.76 | 4.80  | Yes | No  | Yes | SCLC                 | Poor             |          | Extensive stage |
| 63 | Male   | 55 | 1.60   | 1.08  | 14.16 | 0.30  | No  | No  | Yes | Benign lesion        |                  |          |                 |
| 64 | Male   | 77 | 2.54   | 4.28  | 9.67  | 1.30  | Yes | Yes | No  | SCC                  | Moderate         |          | AJCC stage I    |
| 65 | Male   | 48 | 2.66   | 6.90  | 12.11 | 0.80  | Yes | Yes | No  | SCC                  | Moderate         |          | AJCC stage I    |
| 66 | Female | 52 | 17.90  | 2.41  | 11.45 | 0.60  | No  | No  | Yes | Adenocarcinoma       | Indeterminate    |          | AJCC stage I    |
| 67 | Female | 58 | 2.57   | 3.82  | 14.04 | 0.40  | No  | Yes | No  | Adenocarcinoma       | Poor             |          | AJCC stage III  |
| 68 | Male   | 52 | 2.33   | 16.93 | 22.45 | 4.60  | Yes | Yes | No  | SCC                  | Moderate         |          | AJCC stage III  |
| 69 | Male   | 66 | 5.97   | 3.20  | 7.12  | 0.60  | Yes | Yes | No  | Large-cell carcinoma | Poor             |          | AJCC stage III  |
| 70 | Female | 54 | 3.50   | 1.94  | 10.17 | 0.80  | No  | No  | Yes | SCLC                 | Undifferentiated |          | Limited stage   |
| 71 | Male   | 66 | 5.38   | 1.70  | 12.95 | 0.70  | Yes | Yes | No  | SCC                  | Poor             |          | AJCC stage I    |
| 72 | Male   | 66 | 57.47  | 29.53 | 16.28 | 0.70  | Yes | No  | Yes | Adenocarcinoma       | Poor             | Negative | AJCC stage III  |
| 73 | Female | 56 | 0.84   | 1.70  | 10.03 | 0.60  | No  | Yes | No  | Adenocarcinoma       | Indeterminate    |          | AJCC stage I    |

|    |        |    |        |      |        |      |     |     |     |                |                  |          |                 |
|----|--------|----|--------|------|--------|------|-----|-----|-----|----------------|------------------|----------|-----------------|
| 74 | Male   | 44 | 1.60   | 0.78 | 15.41  | 1.10 | Yes | No  | Yes | Adenocarcinoma | Poor             |          | AJCC stage IV   |
| 75 | Male   | 68 | 8.12   | 6.67 | 11.99  | 0.90 | No  | No  | Yes | Adenocarcinoma | Indeterminate    |          | AJCC stage III  |
| 76 | Male   | 58 | 163.06 | 4.37 | 40.14  | 0.40 | Yes | No  | Yes | SCLC           | Undifferentiated |          | Extensive stage |
| 77 | Female | 48 | 1.71   | 1.76 | 8.52   | 1.60 | No  | Yes | No  | Adenocarcinoma | Well             |          | AJCC stage I    |
| 78 | Male   | 55 | 3.67   | 5.78 | 27.56  | 1.20 | Yes | Yes | No  | Adenocarcinoma | Moderate         | Negative | AJCC stage III  |
| 79 | Female | 70 | 11.43  | 5.72 | 19.55  | 1.90 | No  | Yes | No  | Adenocarcinoma | Well             |          | AJCC stage I    |
| 80 | Male   | 51 | 4.91   | 2.57 | 12.39  | 0.60 | Yes | Yes | No  | Adenocarcinoma | Moderate         |          | AJCC stage I    |
| 81 | Female | 49 | 52.17  | 8.08 | 13.22  | 0.40 | No  | No  | Yes | Adenocarcinoma | Indeterminate    |          | AJCC stage IV   |
| 82 | Female | 58 | 1.12   | 1.88 | 9.82   | 0.60 | No  | Yes | No  | Benign lesion  |                  |          |                 |
| 83 | Male   | 60 | 4.14   | 4.04 | 9.76   | 1.30 | Yes | Yes | No  | Benign lesion  |                  |          |                 |
| 84 | Male   | 58 | 4.83   | 1.16 | 8.32   | 0.60 | No  | Yes | No  | Benign lesion  |                  |          |                 |
| 85 | Male   | 60 | 2.60   | 1.84 | 11.41  | 2.10 | Yes | Yes | No  | SCC            | Moderate         |          | AJCC stage I    |
| 86 | Male   | 67 | 1.71   | 2.07 | 14.44  | 1.10 | No  | Yes | No  | SCC            | Moderate         |          | AJCC stage I    |
| 87 | Male   | 64 | 21.27  | 2.17 | 11.64  | 1.00 | Yes | No  | Yes | Adenocarcinoma | Indeterminate    |          | AJCC stage IV   |
| 88 | Male   | 47 | 0.71   | 2.14 | 19.22  | 0.80 | Yes | Yes | No  | Benign lesion  |                  |          |                 |
| 89 | Male   | 66 | 8.59   | 5.98 | 77.50  | 0.70 | Yes | No  | Yes | SCLC           | Undifferentiated |          | Extensive stage |
| 90 | Male   | 46 | 4.05   | 7.00 | 16.32  | 0.70 | Yes | No  | Yes | Adenocarcinoma | Indeterminate    |          | AJCC stage IV   |
| 91 | Female | 42 | 0.83   | 1.05 | 6.84   | 0.60 | No  | No  | Yes | Benign lesion  |                  |          |                 |
| 92 | Male   | 61 | 1.24   | 1.92 | 7.96   | 0.90 | Yes | Yes | No  | Benign lesion  |                  |          |                 |
| 93 | Male   | 46 | 2.07   | 1.34 | 8.84   | 0.80 | Yes | No  | Yes | Benign lesion  |                  |          |                 |
| 94 | Female | 75 | 3.71   | 2.66 | 11.90  | 0.90 | No  | Yes | No  | Benign lesion  |                  |          |                 |
| 95 | Female | 51 | 0.68   | 1.80 | 27.96  | 0.40 | No  | No  | Yes | SCLC           | Poor             |          | Extensive stage |
| 96 | Male   | 59 | 1.98   | 2.75 | 370.00 | 0.40 | Yes | No  | Yes | SCLC           | Undifferentiated |          | Extensive stage |
| 97 | Male   | 61 | 1.57   | 1.97 | 17.27  | 1.00 | Yes | Yes | No  | SCC            | Poor             |          | AJCC stage III  |
| 98 | Male   | 66 | 5.23   | 3.11 | 10.49  | 0.80 | Yes | Yes | No  | Adenocarcinoma | Indeterminate    |          | AJCC stage I    |

|     |        |    |        |       |       |       |     |     |     |                |                  |          |                 |
|-----|--------|----|--------|-------|-------|-------|-----|-----|-----|----------------|------------------|----------|-----------------|
| 99  | Female | 55 | 4.84   | 13.32 | 17.60 | 2.70  | No  | No  | Yes | Adenocarcinoma | Indeterminate    | Negative | AJCC stage IV   |
| 100 | Male   | 60 | 5.74   | 5.17  | 10.02 | 1.00  | Yes | Yes | No  | Adenocarcinoma | Moderate         |          | AJCC stage II   |
| 101 | Male   | 65 | 203.95 | 4.84  | 9.57  | 1.50  | Yes | Yes | No  | Adenocarcinoma | Indeterminate    | Positive | AJCC stage III  |
| 102 | Male   | 74 | 2.58   | 1.71  | 10.72 | 1.00  | Yes | Yes | No  | Adenocarcinoma | Moderate         |          | AJCC stage I    |
| 103 | Male   | 70 | 2.14   | 3.52  | 17.23 | 0.60  | Yes | No  | Yes | Adenocarcinoma | Indeterminate    |          | AJCC stage III  |
| 104 | Male   | 57 | 6.94   | 2.39  | 12.23 | 1.10  | Yes | Yes | No  | Adenocarcinoma | Well             |          | AJCC stage I    |
| 105 | Male   | 38 | 3.67   | 1.96  | 9.04  | 0.80  | No  | No  | Yes | Benign lesion  |                  |          |                 |
| 106 | Female | 56 | 16.48  | 2.64  | 13.82 | 0.50  | No  | Yes | No  | Adenocarcinoma | Well             | Positive | AJCC stage IV   |
| 107 | Male   | 50 | 6.38   | 2.53  | 12.73 | 1.30  | Yes | Yes | No  | Adenocarcinoma | Moderate         |          | AJCC stage III  |
| 108 | Male   | 20 | 1.89   | 3.34  | 14.96 | 1.30  | No  | No  | Yes | SCLC           | Undifferentiated |          | Extensive stage |
| 109 | Female | 56 | 1.28   | 1.83  | 9.94  | 0.60  | No  | Yes | No  | Benign lesion  |                  |          |                 |
| 110 | Male   | 69 | 3.53   | 4.87  | 8.91  | 0.70  | Yes | No  | Yes | Adenocarcinoma | Indeterminate    |          | AJCC stage III  |
| 111 | Male   | 49 | 3.60   | 8.16  | 10.94 | 1.30  | No  | No  | Yes | Adenocarcinoma | Poor             |          | AJCC stage IV   |
| 112 | Male   | 60 | 115.43 | 5.90  | 8.87  | 1.10  | Yes | Yes | No  | Adenocarcinoma | Poor             | Negative | AJCC stage III  |
| 113 | Male   | 58 | 1.85   | 1.19  | 9.46  | 0.90  | Yes | Yes | No  | Adenocarcinoma | Moderate         |          | AJCC stage I    |
| 114 | Female | 37 | 5.18   | 0.67  | 11.40 | 0.80  | No  | Yes | No  | Adenocarcinoma | Moderate         |          | AJCC stage I    |
| 115 | Male   | 65 | 1.64   | 4.08  | 12.27 | 2.40  | Yes | Yes | No  | SCC            | Well             |          | AJCC stage I    |
| 116 | Female | 65 | 1.72   | 2.45  | 12.85 | 0.30  | No  | Yes | No  | Adenocarcinoma | Well             |          | AJCC stage I    |
| 117 | Female | 46 | 1.32   | 1.46  | 8.21  | 0.70  | No  | Yes | No  | Benign lesion  |                  |          |                 |
| 118 | Male   | 63 | 2.96   | 4.33  | 19.91 | 1.20  | Yes | No  | Yes | Adenocarcinoma | Indeterminate    |          | AJCC stage IV   |
| 119 | Female | 53 | 7.84   | 1.54  | 16.58 | 0.30  | No  | No  | Yes | Adenocarcinoma | Moderate         |          | AJCC stage IV   |
| 120 | Male   | 67 | 7.34   | 9.14  | 14.28 | 27.20 | Yes | No  | Yes | SCC            | Indeterminate    |          | AJCC stage IV   |
| 121 | Male   | 61 | 3.10   | 9.15  | 27.28 | 0.40  | Yes | Yes | No  | Adenocarcinoma | Indeterminate    | Positive | AJCC stage IV   |
| 122 | Male   | 67 | 3.40   | 13.11 | 12.83 | 2.00  | Yes | No  | Yes | SCC            | Indeterminate    |          | AJCC stage III  |
| 123 | Male   | 61 | 2.11   | 5.15  | 10.47 | 2.20  | Yes | No  | Yes | SCC            | Indeterminate    |          | AJCC stage III  |

|     |        |    |        |       |       |       |     |     |     |                |                  |          |                 |
|-----|--------|----|--------|-------|-------|-------|-----|-----|-----|----------------|------------------|----------|-----------------|
| 124 | Male   | 66 | 2.31   | 5.50  | 17.02 | 1.00  | Yes | Yes | No  | Adenocarcinoma | Moderate         |          | AJCC stage IV   |
| 125 | Male   | 61 | 573.81 | 3.90  | 9.38  | 0.80  | No  | No  | Yes | Adenocarcinoma | Indeterminate    |          | AJCC stage III  |
| 126 | Female | 65 | 4.29   | 2.45  | 11.12 | 0.90  | No  | No  | Yes | Adenocarcinoma | Indeterminate    |          | AJCC stage IV   |
| 127 | Male   | 37 | 1.14   | 0.98  | 9.52  | 0.40  | No  | No  | Yes | Adenocarcinoma | Indeterminate    |          | AJCC stage I    |
| 128 | Female | 50 | 59.39  | 2.26  | 15.73 | 0.40  | No  | Yes | No  | Adenocarcinoma | Moderate         |          | AJCC stage III  |
| 129 | Male   | 54 | 9.26   | 0.82  | 10.56 | 0.50  | Yes | No  | Yes | SCLC           | Undifferentiated |          | Extensive stage |
| 130 | Male   | 61 | 1.30   | 3.38  | 9.78  | 0.80  | Yes | Yes | No  | Benign lesion  |                  |          |                 |
| 131 | Female | 58 | 33.83  | 5.10  | 16.34 | 0.70  | No  | No  | Yes | Adenocarcinoma | Indeterminate    |          | AJCC stage IV   |
| 132 | Female | 51 | 2.09   | 2.10  | 8.04  | 1.30  | No  | Yes | No  | Adenocarcinoma | Moderate         |          | AJCC stage III  |
| 133 | Male   | 49 | 3.22   | 54.01 | 24.44 | 4.50  | Yes | No  | Yes | SCC            | Indeterminate    |          | AJCC stage III  |
| 134 | Male   | 51 | 1.68   | 7.74  | 61.25 | 0.80  | No  | No  | Yes | SCLC           | Undifferentiated |          | Extensive stage |
| 135 | Male   | 67 | 41.39  | 2.52  | 14.63 | 1.00  | No  | No  | Yes | SCC            | Indeterminate    |          | AJCC stage III  |
| 136 | Female | 63 | 1.73   | 1.88  | 10.96 | 0.40  | No  | Yes | No  | Benign lesion  |                  |          |                 |
| 137 | Female | 51 | 47.58  | 2.08  | 10.18 | 0.50  | No  | No  | Yes | Adenocarcinoma | Indeterminate    |          | AJCC stage IV   |
| 138 | Male   | 63 | 3.35   | 1.73  | 10.27 | 0.40  | No  | No  | Yes | SCC            | Indeterminate    |          | AJCC stage I    |
| 139 | Male   | 47 | 1.68   | 6.04  | 24.30 | 0.40  | Yes | No  | Yes | Adenocarcinoma | Indeterminate    | Negative | AJCC stage III  |
| 140 | Male   | 74 | 5195.9 | 53.30 | 54.44 | 0.90  | Yes | No  | Yes | Adenocarcinoma | Poor             | Positive | AJCC stage IV   |
| 141 | Female | 48 | 5.56   | 5.95  | 11.43 | 0.30  | No  | No  | Yes | Adenocarcinoma | Indeterminate    |          | AJCC stage IV   |
| 142 | Male   | 56 | 13.21  | 2.19  | 13.04 | 0.80  | Yes | No  | Yes | Adenocarcinoma | Indeterminate    | Positive | AJCC stage IV   |
| 143 | Male   | 67 | 2.45   | 1.73  | 13.75 | 16.20 | Yes | No  | Yes | SCC            | Indeterminate    |          | AJCC stage III  |
| 144 | Male   | 55 | 2.87   | 4.73  | 15.03 | 0.80  | No  | No  | Yes | Adenocarcinoma | Indeterminate    |          | AJCC stage IV   |
| 145 | Male   | 70 | 3.41   | 1.40  | 11.21 | 1.20  | No  | Yes | No  | SCC            | Poor             |          | AJCC stage II   |
| 146 | Male   | 48 | 11.37  | 3.14  | 8.51  | 1.10  | Yes | No  | Yes | Adenocarcinoma | Poor             | Negative | AJCC stage III  |
| 147 | Female | 46 | 2.01   | 1.07  | 10.09 | 0.30  | No  | Yes | No  | Benign lesion  |                  |          |                 |
| 148 | Male   | 69 | 3.38   | 3.84  | 7.86  | 0.90  | Yes | Yes | No  | SCC            | Poor             |          | AJCC stage I    |

|     |        |    |       |       |        |       |     |     |     |                |                  |          |                 |
|-----|--------|----|-------|-------|--------|-------|-----|-----|-----|----------------|------------------|----------|-----------------|
| 149 | Female | 53 | 3.13  | 21.62 | 13.76  | 0.50  | No  | Yes | No  | Adenocarcinoma | Poor             |          | AJCC stage III  |
| 150 | Male   | 48 | 1.39  | 1.43  | 11.99  | 0.70  | Yes | No  | Yes | Adenocarcinoma | Indeterminate    |          | AJCC stage II   |
| 151 | Male   | 33 | 3.37  | 1.49  | 18.16  | 0.50  | Yes | No  | Yes | Benign lesion  |                  |          |                 |
| 152 | Male   | 66 | 5.40  | 2.38  | 14.51  | 1.20  | Yes | No  | Yes | SCC            | Indeterminate    |          | AJCC stage I    |
| 153 | Male   | 67 | 1.21  | 2.24  | 12.70  | 0.70  | Yes | Yes | No  | Adenocarcinoma | Indeterminate    |          | AJCC stage I    |
| 154 | Female | 66 | 1.28  | 1.50  | 8.22   | 0.60  | No  | Yes | No  | SCLC           | Undifferentiated |          | Extensive stage |
| 155 | Male   | 66 | 7.64  | 5.63  | 10.30  | 3.20  | Yes | No  | Yes | Adenocarcinoma | Indeterminate    |          | AJCC stage III  |
| 156 | Male   | 45 | 23.77 | 7.57  | 15.67  | 0.60  | No  | No  | Yes | Adenocarcinoma | Indeterminate    |          | AJCC stage IV   |
| 157 | Male   | 77 | 2.75  | 3.93  | 17.33  | 1.30  | Yes | No  | Yes | Benign lesion  |                  |          |                 |
| 158 | Male   | 64 | 0.71  | 7.51  | 12.04  | 11.10 | No  | No  | Yes | SCC            | Indeterminate    |          | AJCC stage III  |
| 159 | Male   | 46 | 4.24  | 8.56  | 17.15  | 1.50  | Yes | Yes | No  | SCC            | Well             |          | AJCC stage III  |
| 160 | Female | 50 | 1.64  | 1.44  | 5.34   | 0.30  | No  | No  | Yes | Benign lesion  |                  |          |                 |
| 161 | Male   | 71 | 4.51  | 1.75  | 14.08  | 0.70  | Yes | Yes | No  | SCLC           | Undifferentiated |          | Limited stage   |
| 162 | Male   | 51 | 1.97  | 3.34  | 7.83   | 0.80  | Yes | No  | Yes | Benign lesion  |                  |          |                 |
| 163 | Male   | 58 | 3.08  | 68.11 | 34.45  | 0.80  | Yes | No  | Yes | SCC            | Poor             |          | AJCC stage IV   |
| 164 | Female | 54 | 17.66 | 2.25  | 10.79  | 1.50  | No  | No  | Yes | Adenocarcinoma | Indeterminate    |          | AJCC stage IV   |
| 165 | Female | 51 | 0.83  | 2.18  | 11.41  | 0.10  | No  | Yes | No  | Adenocarcinoma | Moderate         | Positive | AJCC stage IV   |
| 166 | Male   | 67 | 3.73  | 28.07 | 14.89  | 1.40  | No  | Yes | No  | SCC            | Moderate         |          | AJCC stage I    |
| 167 | Male   | 66 | 1.33  | 3.71  | 13.70  | 0.50  | Yes | No  | Yes | SCLC           | Poor             |          | Limited stage   |
| 168 | Male   | 61 | 5.42  | 1.59  | 83.94  | 0.80  | Yes | No  | No  | SCLC           | Undifferentiated |          | Extensive stage |
| 169 | Male   | 64 | 12.17 | 1.90  | 22.07  | 0.60  | Yes | No  | Yes | SCLC           | Undifferentiated |          | Extensive stage |
| 170 | Male   | 63 | 42.84 | 25.80 | 263.70 | 3.10  | Yes | No  | Yes | SCLC           | Undifferentiated |          | Extensive stage |
| 171 | Male   | 63 | 10.35 | 6.17  | 28.50  | 0.60  | Yes | No  | Yes | SCLC           | Undifferentiated |          | Extensive stage |
| 172 | Male   | 67 | 3.31  | 1.79  | 12.48  | 4.90  | Yes | No  | Yes | SCLC           | Undifferentiated |          | Limited stage   |
| 173 | Male   | 53 | 3.10  | 2.38  | 46.01  | 0.70  | Yes | No  | Yes | SCLC           | Undifferentiated |          | Extensive stage |

|     |        |    |       |       |        |      |     |     |     |                      |                  |                 |
|-----|--------|----|-------|-------|--------|------|-----|-----|-----|----------------------|------------------|-----------------|
| 174 | Male   | 47 | 7.00  | 2.01  | 244.10 | 1.00 | Yes | No  | Yes | SCLC                 | Undifferentiated | Limited stage   |
| 175 | Male   | 64 | 2.57  | 1.49  | 15.92  | 0.90 | No  | Yes | No  | SCLC                 | Undifferentiated | Limited stage   |
| 176 | Male   | 74 | 2.62  | 6.15  | 104.70 | 0.60 | Yes | No  | Yes | SCLC                 | Undifferentiated | Extensive stage |
| 177 | Male   | 62 | 7.47  | 2.36  | 14.01  | 1.00 | Yes | No  | Yes | SCLC                 | Undifferentiated | Extensive stage |
| 178 | Male   | 69 | 3.96  | 2.71  | 9.03   | 1.30 | No  | No  | No  | SCLC                 | Poor             | Limited stage   |
| 179 | Male   | 42 | 2.33  | 1.29  | 81.02  | 0.50 | Yes | No  | Yes | SCLC                 | Undifferentiated | Extensive stage |
| 180 | Male   | 58 | 2.76  | 1.37  | 12.41  | 0.50 | Yes | No  | Yes | SCLC                 | Undifferentiated | Limited stage   |
| 181 | Male   | 46 | 1.07  | 3.23  | 19.23  | 0.90 | Yes | No  | No  | SCLC                 | Undifferentiated | Limited stage   |
| 182 | Male   | 63 | 2.05  | 1.63  | 38.73  | 0.50 | Yes | No  | Yes | SCLC                 | Undifferentiated | Extensive stage |
| 183 | Male   | 63 | 1.88  | 1.57  | 17.50  | 1.10 | Yes | No  | Yes | SCLC                 | Undifferentiated | Limited stage   |
| 184 | Female | 63 | 1.86  | 0.90  | 12.97  | 0.60 | No  | No  | Yes | SCLC                 | Undifferentiated | Limited stage   |
| 185 | Male   | 57 | 10.96 | 3.53  | 149.40 | 1.50 | Yes | No  | Yes | SCLC                 | Undifferentiated | Extensive stage |
| 186 | Male   | 68 | 1.86  | 2.28  | 17.03  | 0.60 | Yes | No  | Yes | SCLC                 | Undifferentiated | Limited stage   |
| 187 | Female | 50 | 44.86 | 3.76  | 13.96  | 0.80 | No  | No  | Yes | Large-cell carcinoma | Indeterminate    | AJCC stage III  |
| 188 | Male   | 69 | 3.53  | 15.20 | 72.34  | 0.70 | Yes | No  | Yes | SCLC                 | Undifferentiated | Extensive stage |
| 189 | Male   | 54 | 22.57 | 1.84  | 25.42  | 0.50 | Yes | No  | Yes | SCLC                 | Undifferentiated | Extensive stage |
| 190 | Male   | 51 | 27.57 | 6.24  | 101.00 | 0.70 | Yes | No  | Yes | SCLC                 | Undifferentiated | Extensive stage |
| 191 | Male   | 69 | 2.45  | 2.87  | 53.34  | 1.40 | Yes | No  | Yes | SCLC                 | Undifferentiated | Extensive stage |
| 192 | Male   | 53 | 19.14 | 4.73  | 73.90  | 0.30 | No  | No  | Yes | SCLC                 | Undifferentiated | Extensive stage |
| 193 | Male   | 41 | 10.38 | 1.75  | 25.10  | 1.10 | No  | Yes | No  | SCLC                 | Undifferentiated | Extensive stage |
| 194 | Male   | 72 | 1.75  | 3.07  | 31.51  | 1.00 | No  | No  | No  | SCLC                 | Undifferentiated | Extensive stage |
| 195 | Female | 57 | 0.82  | 1.51  | 73.22  | 0.20 | No  | No  | Yes | SCLC                 | Undifferentiated | Limited stage   |
| 196 | Male   | 48 | 1.77  | 4.51  | 211.90 | 0.70 | Yes | No  | Yes | SCLC                 | Undifferentiated | Extensive stage |
| 197 | Male   | 48 | 1.80  | 10.03 | 175.90 | 0.60 | Yes | No  | Yes | SCLC                 | Undifferentiated | Extensive stage |
| 198 | Male   | 63 | 2.82  | 2.36  | 24.81  | 1.80 | Yes | Yes | No  | SCLC                 | Undifferentiated | Extensive stage |



|     |      |    |      |       |       |      |     |     |     |                |                  |  |                 |
|-----|------|----|------|-------|-------|------|-----|-----|-----|----------------|------------------|--|-----------------|
| 199 | Male | 68 | 2.38 | 10.90 | 11.96 | 0.60 | Yes | No  | Yes | SCLC           | Undifferentiated |  | Extensive stage |
| 200 | Male | 72 | 1.87 | 1.65  | 17.19 | 0.60 | Yes | Yes | No  | SCLC           | Undifferentiated |  | Limited stage   |
| 201 | Male | 66 | 6.29 | 1.78  | 10.70 | 1.30 | Yes | Yes | No  | Adenocarcinoma | Indeterminate    |  | AJCC stage I    |

AJCC: American Joint Committee on Cancer, EGFR: epidermal growth factor receptor, CEA: carcino embryonie antigen, CYFRA21-1: cytokeratin 19 fragments, NSE: neuron specific enolase, SCC-Ag: squamous cell carcinoma antigen, SCC: squamous-cell carcinoma, SCLC: small-cell lung carcinoma.
